# Supplementary material for: Parallel between the isotopic composition of coccolith calcite and carbon levels across Termination II: Developing a new paleo-CO 2 probe
Source: Copernicus journal article supplement (doi:10.5194/cp-2021-76), 2021-06-28
Supplement: Supplementary file [file cp-2021-76-AC2-supplement.pdf]

Supplement to: Reply on RC2, cp-2021-76

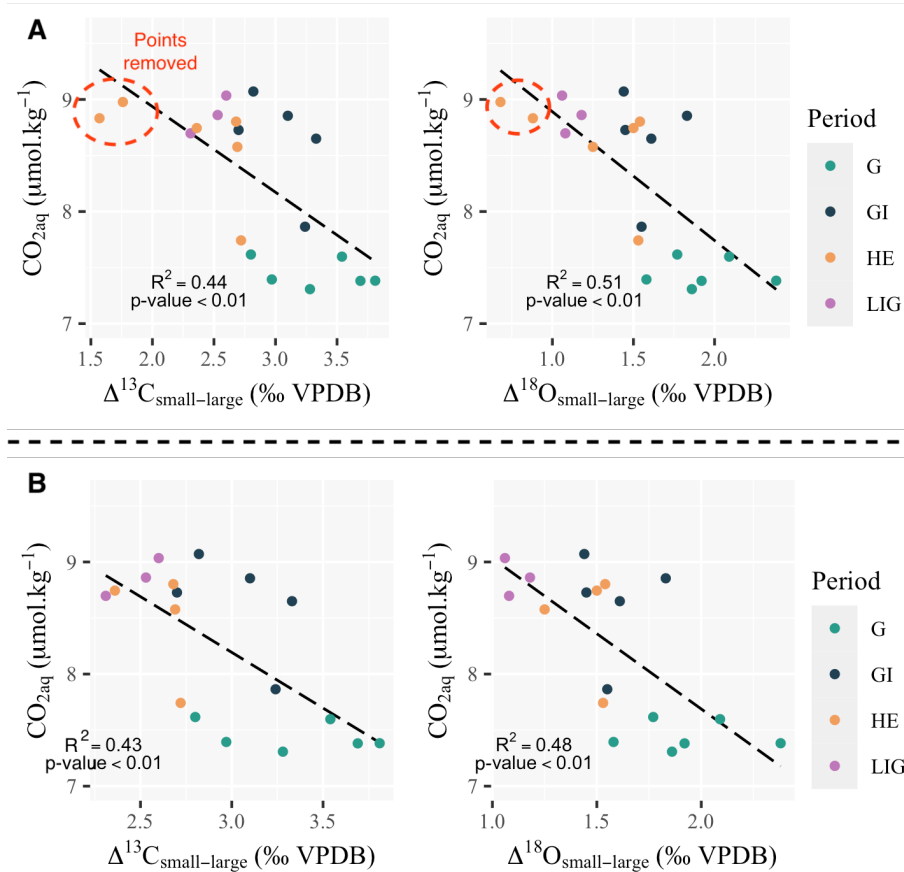

**Figure 1: Impact of the removal of two points with High  $\text{CO}_2$  – Low Differential Vital Effect on the correlation.** In panel A, we've represented the correlation as it appears in the manuscript. The point colors correspond to the time periods identified in the original manuscript. In panel B, we've represented the results for the same dataset excluding the two points with low differential vital effects.

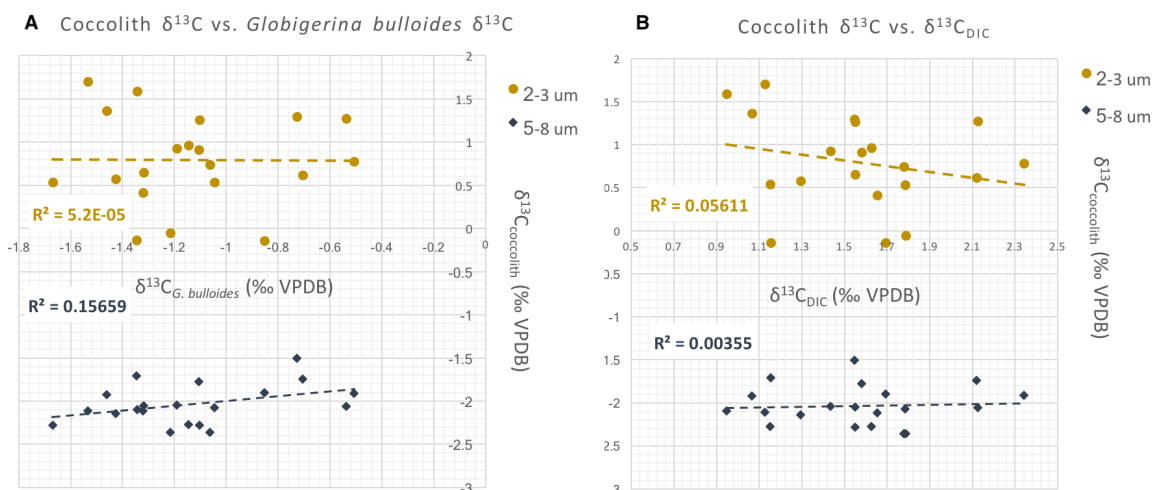

**Figure 2: Comparison of the  $\delta^{13}\text{C}$  composition of the two coccolith size fractions considered with the foraminifera reference (A) and the inorganic reference (B).**
